# Supplementary material for: Trends in Opioid Toxicity–Related Deaths in the US Before and After the Start of the COVID-19 Pandemic, 2011-2021
Source: PubMed Central journal article supplement (PMC10329206; doi:10.1001/jamanetworkopen.2023.22303), 2023-07-07
Supplement: jamanetwopen-e2322303-s001.pdf [file jamanetwopen-e2322303-s001.pdf]

## Supplementary Online Content

Gomes T, Ledlie S, Tadrous M, Mamdani M, Paterson JM, Juurlink DN. Trends in opioid toxicity–related deaths in the US before and after the start of the COVID-19 pandemic, 2011-2021. *JAMA Netw Open*. 2023;6(7):e2322303.  
doi:10.1001/jamanetworkopen.2023.22303

**eTable 1.** Databases Used to Capture All-Cause and Opioid-Toxicity Deaths in the United States

**eTable 2.** *International Classification of Diseases and Related Health Problems, 10th Revision* Diagnosis Codes and Descriptions

**eTable 3.** Details on Calculation of Years of Life Lost

**eTable 4.** Years of Life Lost Due to Accidental Opioid Toxicities in the United States. Overall and by Age and Sex, 2011 to 2018

This supplementary material has been provided by the authors to give readers additional information about their work.

**eTable 1: Databases used to capture all-cause and opioid-toxicity deaths in the United States.**

| <b>Data Element</b>       | <b>Data Source</b>                                               | <b>Description</b>                                                                                                                                                                                                                                                                                                                                                                                        |
|---------------------------|------------------------------------------------------------------|-----------------------------------------------------------------------------------------------------------------------------------------------------------------------------------------------------------------------------------------------------------------------------------------------------------------------------------------------------------------------------------------------------------|
| Opioid Toxicity Deaths    | U.S. CDC Wonder Database Multiple Cause of Death Online Database | This database captures national-level mortality and population data for all U.S. residents using information recorded on death certificates including a single underlying cause of death and up to 20 additional multiple causes of death. Data are reported by single-year and 5-year age groups, sex, and calendar year, and are suppressed in cases where fewer than 10 deaths occur within a stratum. |
| U.S. Population Estimates | U.S. CDC Wonder Database Multiple Cause of Death Online Database | This database captures population estimates for the U.S. based on the U.S. Census Bureau estimates of national resident populations as of July 1 <sup>st</sup> of each year.                                                                                                                                                                                                                              |

**eTable 2: International Classification of Diseases and Related Health Problems, 10<sup>th</sup> Revision Diagnosis Codes and Descriptions**

| ICD-10 Code | Descriptions                                                                                                                                |
|-------------|---------------------------------------------------------------------------------------------------------------------------------------------|
| X40         | Accidental poisoning by and exposure to nonopioid analgesics, antipyretics and antirheumatics                                               |
| X41         | Accidental poisoning by and exposure to antiepileptic, sedative-hypnotic, antiparkinsonism and psychotropic drugs, not elsewhere classified |
| X42         | Accidental poisoning by and exposure to narcotics and psychodysleptics [hallucinogens], not elsewhere classified                            |
| X43         | Accidental poisoning by and exposure to other drugs acting on the autonomic nervous system                                                  |
| X44         | Accidental poisoning by and exposure to other and unspecified drugs, medicaments and biological substances                                  |
| T40.0       | Opium                                                                                                                                       |
| T40.1       | Heroin                                                                                                                                      |
| T40.2       | Other Opioids                                                                                                                               |
| T40.3       | Methadone                                                                                                                                   |
| T40.4       | Other Synthetic Narcotics                                                                                                                   |
| T40.6       | Other and Unspecified Narcotics                                                                                                             |

**eTable 3: Details on calculation of Years of Life Lost**

| <b>YLL Component</b>                 | <b>Definition</b>                                                                                                                                                                                                                       |
|--------------------------------------|-----------------------------------------------------------------------------------------------------------------------------------------------------------------------------------------------------------------------------------------|
| <b>5-year life expectancy tables</b> | We calculated the YLL using 2019 standard 5-year life expectancy tables published by the CDC*                                                                                                                                           |
| <b>Discounting and Age Weights</b>   | We did not apply discounting or age weights to YLL estimates to align with World Health Organizations guidance**                                                                                                                        |
| <b>Average age at death</b>          | We determined the average age at death for each 5-year age group using the single-year age-stratified estimates of accidental opioid-toxicity deaths accessed from the U.S. CDC Wonder Database Multiple Cause of Death Online Database |

\*Centers for Disease Control and Prevention. National Center for Health Statistics Multiple cause of death files, 1999-2021. CDC Wonder Online Database. <https://wonder.cdc.gov/mcd.html>. Published 2022. Accessed February 2, 2023

\*\*Department of Information Evidence and Research. WHO Methods and Data Sources for Global Burden of Disease Estimates 2000-2015. Geneva, Switzerland. 2017.

**eTable 4: Years of Life Lost due to Accidental Opioid Toxicities in the United States. Overall and by Age and Sex, 2011 to 2018**

| Age Groups     | 2011                             |                    |         |              | 2012                             |                    |         |              |
|----------------|----------------------------------|--------------------|---------|--------------|----------------------------------|--------------------|---------|--------------|
|                | Accidental Opioid-Related Deaths | Deaths Per Million | YLLs    | YLL per 1000 | Accidental Opioid-Related Deaths | Deaths Per Million | YLLs    | YLL per 1000 |
| <b>Overall</b> | 19,395                           | 83.8               | 777,597 | 3.4          | 19,782                           | 84.7               | 785,921 | 3.4          |
| <b>15-19</b>   | 492                              | 22.7               | 29,641  | 1.4          | 379                              | 17.7               | 22,778  | 1.1          |
| <b>20-29</b>   | 4,106                            | 94.5               | 220,718 | 5.1          | 4,064                            | 92.4               | 218,409 | 5.0          |
| <b>30-39</b>   | 4,526                            | 112.9              | 205,212 | 5.1          | 4,779                            | 118.3              | 216,721 | 5.4          |
| <b>40-49</b>   | 4,992                            | 115.6              | 180,580 | 4.2          | 4,994                            | 116.9              | 180,333 | 4.2          |
| <b>50-59</b>   | 4,283                            | 100.0              | 120,978 | 2.8          | 4,389                            | 101.2              | 123,700 | 2.9          |
| <b>60-74</b>   | 996                              | 24.7               | 20,468  | 0.5          | 1177                             | 28.2               | 23,980  | 0.6          |
| <b>Males</b>   | 12,681                           | 110.7              | 505,423 | 4.4          | 12,969                           | 112.2              | 510,897 | 4.4          |
| <b>15-19</b>   | 377                              | 33.9               | 22,281  | 2.0          | 296                              | 27.0               | 17,496  | 1.6          |
| <b>20-29</b>   | 3,094                            | 140.2              | 162,788 | 7.4          | 3,010                            | 134.4              | 158,338 | 7.1          |
| <b>30-39</b>   | 3,105                            | 154.9              | 136,862 | 6.8          | 3,306                            | 163.6              | 145,667 | 7.2          |
| <b>40-49</b>   | 3,002                            | 140.2              | 104,188 | 4.9          | 3,065                            | 144.7              | 106,498 | 5.0          |
| <b>50-59</b>   | 2,545                            | 121.9              | 68,337  | 3.3          | 2,596                            | 122.8              | 69,408  | 3.3          |
| <b>60-74</b>   | 558                              | 29.3               | 10,967  | 0.6          | 696                              | 35.3               | 13,489  | 0.7          |
| <b>Females</b> | 6,714                            | 57.4               | 272,174 | 2.3          | 6,813                            | 57.8               | 275,024 | 2.3          |
| <b>15-19</b>   | 115                              | 10.9               | 7,361   | 0.7          | 83                               | 8.0                | 5,282   | 0.5          |
| <b>20-29</b>   | 1012                             | 47.4               | 57,930  | 2.7          | 1054                             | 48.8               | 60,071  | 2.8          |
| <b>30-39</b>   | 1,421                            | 70.8               | 68,351  | 3.4          | 1,473                            | 73.0               | 71,053  | 3.5          |
| <b>40-49</b>   | 1,990                            | 91.4               | 76,392  | 3.5          | 1,929                            | 89.6               | 73,835  | 3.4          |
| <b>50-59</b>   | 1,738                            | 79.2               | 52,641  | 2.4          | 1,793                            | 80.8               | 54,292  | 2.4          |
| <b>60-74</b>   | 438                              | 20.6               | 9,500   | 0.4          | 481                              | 21.8               | 10,491  | 0.5          |

| Age Groups     | 2013                             |                    |         |              | 2014                             |                    |         |              |
|----------------|----------------------------------|--------------------|---------|--------------|----------------------------------|--------------------|---------|--------------|
|                | Accidental Opioid-Related Deaths | Deaths Per Million | YLLs    | YLL per 1000 | Accidental Opioid-Related Deaths | Deaths Per Million | YLLs    | YLL per 1000 |
| <b>Overall</b> | 21,626                           | 91.8               | 852,807 | 3.6          | 24,921                           | 104.7              | 983,772 | 4.1          |
| <b>15-19</b>   | 369                              | 17.4               | 22,206  | 1.0          | 365                              | 17.3               | 21,995  | 1.0          |
| <b>20-29</b>   | 4,471                            | 100.8              | 239,896 | 5.4          | 5,246                            | 116.8              | 281,119 | 6.3          |
| <b>30-39</b>   | 5,155                            | 126.1              | 233,821 | 5.7          | 6,241                            | 150.6              | 282,405 | 6.8          |
| <b>40-49</b>   | 5,160                            | 122.7              | 186,458 | 4.4          | 5,651                            | 136.2              | 204,435 | 4.9          |
| <b>50-59</b>   | 4,978                            | 113.8              | 139,808 | 3.2          | 5,617                            | 127.4              | 157,127 | 3.6          |
| <b>60-74</b>   | 1493                             | 34.4               | 30,618  | 0.7          | 1801                             | 40.1               | 36,691  | 0.8          |
| <b>Males</b>   | 14,252                           | 122.2              | 558,550 | 4.8          | 16,481                           | 140.0              | 645,725 | 5.5          |
| <b>15-19</b>   | 279                              | 25.7               | 16,464  | 1.5          | 261                              | 24.2               | 15,341  | 1.4          |
| <b>20-29</b>   | 3,371                            | 148.9              | 176,972 | 7.8          | 3,899                            | 170.3              | 204,313 | 8.9          |
| <b>30-39</b>   | 3,599                            | 175.8              | 158,955 | 7.8          | 4,407                            | 212.4              | 194,429 | 9.4          |
| <b>40-49</b>   | 3,192                            | 153.0              | 110,780 | 5.3          | 3,506                            | 170.5              | 121,990 | 5.9          |
| <b>50-59</b>   | 2,927                            | 137.1              | 78,121  | 3.7          | 3,373                            | 156.7              | 89,616  | 4.2          |
| <b>60-74</b>   | 884                              | 43.2               | 17,259  | 0.8          | 1035                             | 48.8               | 20,037  | 0.9          |
| <b>Females</b> | 7,374                            | 62.0               | 294,258 | 2.5          | 8,440                            | 70.2               | 338,047 | 2.8          |
| <b>15-19</b>   | 90                               | 8.7                | 5,742   | 0.6          | 104                              | 10.1               | 6,654   | 0.6          |
| <b>20-29</b>   | 1100                             | 50.6               | 62,924  | 2.9          | 1347                             | 61.2               | 76,806  | 3.5          |
| <b>30-39</b>   | 1,556                            | 76.3               | 74,867  | 3.7          | 1,834                            | 88.6               | 87,976  | 4.2          |
| <b>40-49</b>   | 1,968                            | 92.8               | 75,679  | 3.6          | 2,145                            | 102.6              | 82,446  | 3.9          |
| <b>50-59</b>   | 2,051                            | 91.6               | 61,687  | 2.8          | 2,244                            | 99.5               | 67,511  | 3.0          |
| <b>60-74</b>   | 609                              | 26.6               | 13,360  | 0.6          | 766                              | 32.3               | 16,654  | 0.7          |

| Age Groups     | 2015                             |                    |           |              | 2016                             |                    |           |              |
|----------------|----------------------------------|--------------------|-----------|--------------|----------------------------------|--------------------|-----------|--------------|
|                | Accidental Opioid-Related Deaths | Deaths Per Million | YLLs      | YLL per 1000 | Accidental Opioid-Related Deaths | Deaths Per Million | YLLs      | YLL per 1000 |
| <b>Overall</b> | 29,248                           | 121.8              | 1,162,133 | 4.8          | 37,679                           | 156.0              | 1,507,795 | 6.2          |
| <b>15-19</b>   | 450                              | 21.3               | 27,133    | 1.3          | 532                              | 25.2               | 32,075    | 1.5          |
| <b>20-29</b>   | 6,223                            | 137.7              | 332,992   | 7.4          | 8,403                            | 185.6              | 449,296   | 9.9          |
| <b>30-39</b>   | 7,828                            | 186.2              | 353,976   | 8.4          | 10,490                           | 246.5              | 474,073   | 11.1         |
| <b>40-49</b>   | 6,393                            | 155.7              | 231,177   | 5.6          | 7,987                            | 196.5              | 288,385   | 7.1          |
| <b>50-59</b>   | 6,173                            | 139.8              | 172,640   | 3.9          | 7,506                            | 171.3              | 208,121   | 4.7          |
| <b>60-74</b>   | 2,181                            | 46.8               | 44,215    | 0.9          | 2761                             | 57.4               | 55,846    | 1.2          |
| <b>Males</b>   | 19,638                           | 165.2              | 772,361   | 6.5          | 25,995                           | 217.5              | 1,026,952 | 8.6          |
| <b>15-19</b>   | 314                              | 29.1               | 18,473    | 1.7          | 381                              | 35.3               | 22,458    | 2.1          |
| <b>20-29</b>   | 4,629                            | 200.6              | 242,024   | 10.5         | 6,249                            | 270.3              | 326,688   | 14.1         |
| <b>30-39</b>   | 5,584                            | 265.1              | 245,953   | 11.7         | 7,564                            | 354.4              | 333,253   | 15.6         |
| <b>40-49</b>   | 4,114                            | 202                | 143,214   | 7            | 5,320                            | 264.0              | 185,721   | 9.2          |
| <b>50-59</b>   | 3,606                            | 167.2              | 95,727    | 4.4          | 4,717                            | 220.3              | 124,853   | 5.8          |
| <b>60-74</b>   | 1,391                            | 63.2               | 26,971    | 1.2          | 1764                             | 77.7               | 33,978    | 1.5          |
| <b>Females</b> | 9,610                            | 79.2               | 389,772   | 3.2          | 11,684                           | 95.8               | 480,843   | 3.9          |
| <b>15-19</b>   | 136                              | 13.2               | 8,660     | 0.8          | 151                              | 14.6               | 9,616     | 0.9          |
| <b>20-29</b>   | 1,594                            | 72                 | 90,968    | 4.1          | 2154                             | 97.2               | 122,608   | 5.5          |
| <b>30-39</b>   | 2,244                            | 106.9              | 108,023   | 5.1          | 2,926                            | 137.9              | 140,819   | 6.6          |
| <b>40-49</b>   | 2,279                            | 110.1              | 87,963    | 4.2          | 2,667                            | 130.2              | 102,664   | 5.0          |
| <b>50-59</b>   | 2,567                            | 113.7              | 76,914    | 3.4          | 2,789                            | 124.5              | 83,268    | 3.7          |
| <b>60-74</b>   | 790                              | 32.1               | 17,244    | 0.7          | 997                              | 39.2               | 21,868    | 0.9          |

| Age Groups     | 2017                             |                    |           |              | 2018                             |                    |           |              |
|----------------|----------------------------------|--------------------|-----------|--------------|----------------------------------|--------------------|-----------|--------------|
|                | Accidental Opioid-Related Deaths | Deaths Per Million | YLLs      | YLL per 1000 | Accidental Opioid-Related Deaths | Deaths Per Million | YLLs      | YLL per 1000 |
| <b>Overall</b> | 42,861                           | 176.0              | 1,705,316 | 7.0          | 42,355                           | 173.3              | 1,670,148 | 6.8          |
| <b>15-19</b>   | 446                              | 21.1               | 26,828    | 1.3          | 465                              | 22.0               | 28,151    | 1.3          |
| <b>20-29</b>   | 9,320                            | 204.9              | 497,623   | 10.9         | 8,714                            | 191.8              | 464,435   | 10.2         |
| <b>30-39</b>   | 12,226                           | 283.0              | 552,009   | 12.8         | 12,271                           | 280.8              | 553,526   | 12.7         |
| <b>40-49</b>   | 9,052                            | 222.9              | 326,776   | 8.0          | 8,987                            | 222.1              | 324,318   | 8.0          |
| <b>50-59</b>   | 8,507                            | 196.0              | 235,227   | 5.4          | 8,110                            | 189.4              | 223,680   | 5.2          |
| <b>60-74</b>   | 3,310                            | 66.6               | 66,853    | 1.3          | 3808                             | 74.9               | 76,036    | 1.5          |
| <b>Males</b>   | 29,692                           | 246.3              | 1,160,021 | 9.6          | 29,520                           | 244.0              | 1,138,053 | 9.4          |
| <b>15-19</b>   | 313                              | 29.0               | 18,361    | 1.7          | 310                              | 28.8               | 18,293    | 1.7          |
| <b>20-29</b>   | 6,789                            | 292.0              | 353,600   | 15.2         | 6,280                            | 270.5              | 326,405   | 14.1         |
| <b>30-39</b>   | 8,788                            | 404.9              | 386,488   | 17.8         | 8,771                            | 399.0              | 385,142   | 17.5         |
| <b>40-49</b>   | 6,142                            | 305.0              | 214,399   | 10.6         | 6,250                            | 311.5              | 218,542   | 10.9         |
| <b>50-59</b>   | 5,496                            | 259.0              | 145,464   | 6.9          | 5,281                            | 252.1              | 139,492   | 6.7          |
| <b>60-74</b>   | 2,164                            | 92.3               | 41,709    | 1.8          | 2628                             | 109.6              | 50,179    | 2.1          |
| <b>Females</b> | 13,169                           | 107.1              | 545,295   | 4.4          | 12,835                           | 104.0              | 532,095   | 4.3          |
| <b>15-19</b>   | 133                              | 12.9               | 8,466     | 0.8          | 155                              | 15.0               | 9,859     | 1.0          |
| <b>20-29</b>   | 2,531                            | 113.8              | 144,023   | 6.5          | 2434                             | 109.6              | 138,031   | 6.2          |
| <b>30-39</b>   | 3,438                            | 159.9              | 165,521   | 7.7          | 3,500                            | 161.2              | 168,384   | 7.8          |
| <b>40-49</b>   | 2,910                            | 142.1              | 112,377   | 5.5          | 2,737                            | 134.2              | 105,776   | 5.2          |
| <b>50-59</b>   | 3,011                            | 135.7              | 89,764    | 4.0          | 2,829                            | 129.3              | 84,188    | 3.8          |
| <b>60-74</b>   | 1146                             | 43.7               | 25,144    | 1.0          | 1180                             | 44.0               | 25,857    | 1.0          |

*Note: Due to suppressed cells for some age-groups in the CDC-Wonder Database (when the cell represents fewer than 10 persons), total estimates of opioid toxicity deaths reported here may be a slight underestimate of the annual counts accessible in the CDC Wonder Database (since suppressed cells were imputed with a zero value in these calculations).*
