# Supplementary material for: Trends in Opioid Toxicity–Related Deaths in the US Before and After the Start of the COVID-19 Pandemic, 2011-2021
Source: PubMed Central journal article supplement (PMC10329206; doi:10.1001/jamanetworkopen.2023.22303), 2023-07-07
Supplement: jamanetwopen-e2322303-s002.pdf [file jamanetwopen-e2322303-s002.pdf]

## Data Sharing Statement

Gomes. Trends in Opioid Toxicity–Related Deaths in the US Before and After the Start of the COVID-19 Pandemic, 2011-2021. *JAMA Netw Open*. Published July 07, 2023.

doi:10.1001/jamanetworkopen.2023.22303

### Data

**Data available:** No

### Additional Information

**Explanation for why data not available:** Data are all aggregated and available through publicly accessible sources.
